# Supplementary material
Source: PubMed Central journal article supplement (PMC3082276)
Supplement: supp_tpc.110.081653_Supplemental_Data.pdf [file supp_tpc.110.081653_Supplemental_Data.pdf]

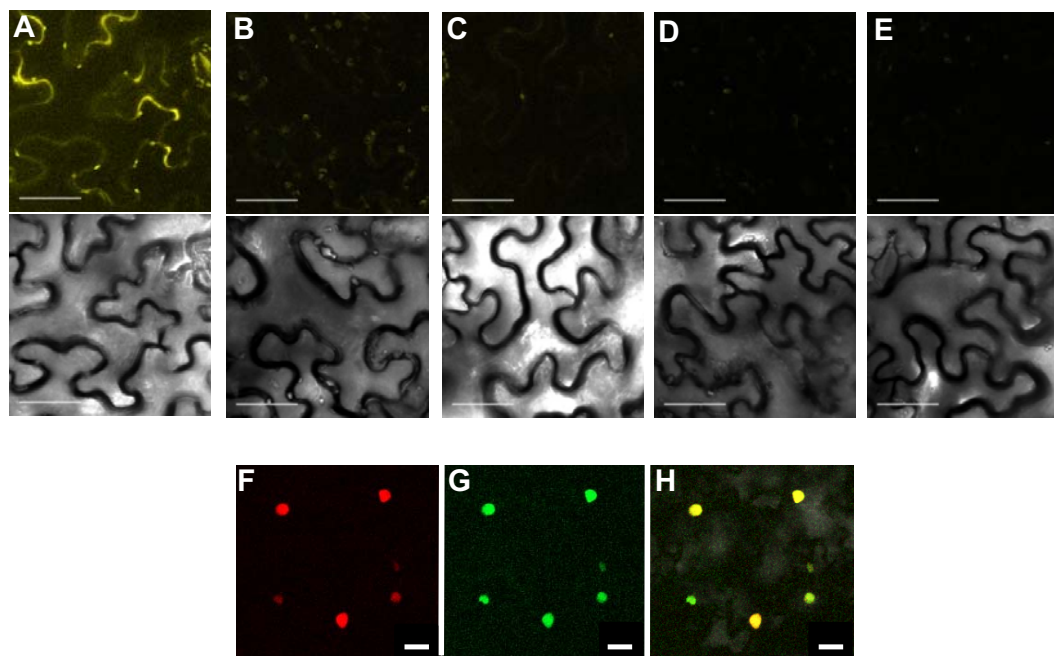

**Supplemental Figure 1. ARF8 and BPEp proteins interact *in vivo* and co-localize in the nucleus.**

**(A-E) ARF8 and BPEp proteins interact *in vivo*.** Bimolecular fluorescence complementation (BiFC) assay reveals that the C-terminal domains of BPEp ( $SD^{BPEp}$ ) and ARF8 ( $CTD^{ARF8}$ ) interact in tobacco leaf cells.  $SD^{BPEp}$  fused to the N-terminal domain of the YFP and  $CTD^{ARF8}$  fused to the C-terminal of the YFP were transiently expressed in *Nicotiana benthamiana* leaf cells. Four days post-infiltration, tobacco leaf cells were analyzed on an Axiovert100M LSM-510 laser-scanning Zeiss confocal microscope.  $SD^{BPEp}$  and  $CTD^{ARF8}$  interact in the cytoplasm of tobacco leaf cells (A). Note that because  $SD^{BPEp}$  and  $CTD^{ARF8}$  lack the nuclear localization signals of BPEp and ARF8, a cytoplasmic interaction is observed in tobacco cells.  $SD^{BPEp}$  mutants R250A (B), D253A (C), F260A (D) and R250A/S251A/D253A (E) lost their ability to interact with ARF8, thus in agreement with the yeast data. For each panel, a fluorescent image (top) and a transmission image (bottom) is presented. Scale bars: 50  $\mu$ m.

**(F-H) ARF8 and BPEp co-localize in the nucleus of the tobacco cells.** BPEp-GFP and mOrange-ARF8 fusion proteins were transiently expressed in *Nicotiana benthamiana* as above, and their cellular localization was analyzed using confocal microscopy. (F) Transient expression of mOrange-ARF8 fusion protein. (G) Transient expression of BPEp-GFP fusion protein. (H) Overlay of (F) and (G) images showing the co-localization of mOrange-ARF8 and BPEp-GFP fusion proteins in the nucleus. Scale bars: 20  $\mu$ m.

|                                                                         |                           |
|-------------------------------------------------------------------------|---------------------------|
| YVKVSMGAPYLRRKIDLKMYKNYPPELLKALENMF                                     | IAA1                      |
| YVKVSMGAPYLRRKIDLKTYKNYPPELLKALENMF                                     | IAA2                      |
| YVKVSMGAPYLRRKIDLSCYKCYSELLKALEVMF                                      | IAA3                      |
| YVKVSMGAPYLRRKIDLTMYKQYPELMKSLENMF                                      | IAA4                      |
| YVKVSDGAAFLRKIDLEMYKCYQDLASALQILF                                       | IAA5                      |
| YMKVSMGAPYLRRKIDLCLHKGYLELALALEKLF                                      | IAA6                      |
| FVKVSMGAPYLRRKVDLRSYTNYGELSSALEKMF                                      | IAA9                      |
| YVKVSMGVPYLRRKMDLGSSQGYDDLAFALDKLF                                      | IAA19                     |
| FVKVSMGAPYLRRKIDLRMYKSYDELSNALSVMF                                      | IAA17                     |
| YVKVSMGAPYLRRKIDLKTYKSYLELSSALEKMF                                      | IAA27                     |
| LVKVSMGAPYLRRKVDLKMYKSYQDLSDALAKMF                                      | IAA7                      |
| FVKVSMGAPYLRRKVDLRTYTSYQQLSSALEKMF                                      | IAA8                      |
| <b>KQYMF</b> LSRY <b>SRGRSLDVYAVRSEKHCNKRSDLC</b> <sup>271</sup>        | <b>SD</b> <sup>BPEP</sup> |
| FVKVYK-SG <b>SVGRSLDI</b> SRFSSYHELREELGKMF                             | ARF8                      |
| FVKVYK-SG <b>SFGRSLDI</b> SKFSSYHELREELARMF                             | ARF6                      |
| HCKV <b>FMESE</b> DVGR <b>TL</b> LDL <b>SVIGSY</b> QELYRKLAE <b>MF</b>  | ARF10                     |
| HCKV <b>FME</b> SDDVGR <b>TL</b> LDL <b>SVLGSY</b> EELSRKLS <b>DMF</b>  | ARF16                     |
| CTKVHKQGI <b>ALGRS</b> VDL <b>SKFQNY</b> EELVAEL <b>DR</b> LF           | ARF2                      |
| YTKVQKTGS-VGR <b>SIDVTS</b> FKDYEELKSAI <b>EC</b> MF                    | ARF5                      |
| YTKVQKRG-SVGR <b>SIDVNRY</b> RGYDELRRHDL <b>AR</b> MF                   | ARF7                      |
| YTKVQKRG-SVGR <b>SIDVTRY</b> SGYDELRRHDL <b>AR</b> MF                   | ARF19                     |
| CTKVHMQGS <b>AVGRA</b> IDL <b>TRSECY</b> EDLFKKLE <b>EM</b> MF          | ARF1                      |
| CTKVHKQGS <b>QVGRA</b> IDL <b>SRLNGY</b> DDLMELE <b>RL</b> LF           | ARF4                      |
| RTKVQM <b>QGPV</b> GRAVDL <b>NALKGY</b> NELIDDI <b>EK</b> LF            | ARF9                      |
| RIKVQM <b>QTAV</b> GRAVDL <b>TLRSY</b> DELIDKELE <b>K</b> MF            | ARF11                     |
| RTKVQM <b>QGI</b> AVGRAVDL <b>TLKSY</b> DELIDLELE <b>E</b> MF           | ARF18                     |
| CTKVQM <b>QGV</b> TI <b>GRA</b> VDL <b>SVLNGY</b> DQLILELE <b>K</b> LF  | ARF12                     |
| CTKVQM <b>QGV</b> TI <b>GRA</b> VDL <b>SVLNGY</b> DQLILELE <b>K</b> LF  | ARF14                     |
| CTKVQM <b>QGV</b> TI <b>GRA</b> VDL <b>SVLNGY</b> DQLILELE <b>K</b> LF  | ARF15                     |
| CTKVQM <b>QGV</b> TI <b>GRA</b> VDL <b>SVLNGY</b> DQLILELE <b>K</b> LF  | ARF20                     |
| CTKVQM <b>QGV</b> TI <b>GRA</b> VDL <b>SVLNGY</b> DQLILELE <b>K</b> LF  | ARF21                     |
| CTKVQM <b>QGV</b> TI <b>IER</b> AVDL <b>SVLNGY</b> DQLILELE <b>E</b> LF | ARF22                     |

**Supplemental Figure 2. Alignment of motif III of ARF and Aux/IAA C-terminal domains with the GRSLD motif of SD<sup>BPEP</sup>.**

Conserved amino acids of the GRSLD motif are highlighted in black background. In grey background are marked amino acids showing high similarity.

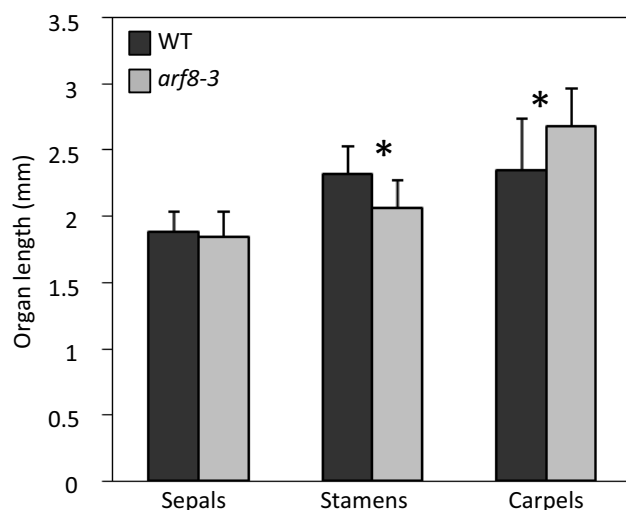

**Supplemental Figure 3. Sepal, stamen and carpel size in *arf8-3* and wild-type plants.**

Sepal, stamen and carpel organ length measurements performed using flowers at development stage 14. Values are given as mean  $\pm$  standard error. For each value measurements were performed using at least 60 organs from at least 8 young plants (mutants and wild-type with no mature siliques) of the same age and grown under the same conditions. Asterisks indicate significant differences between wild-type and *arf8-3* with P value  $< 0.001$  (t-test).

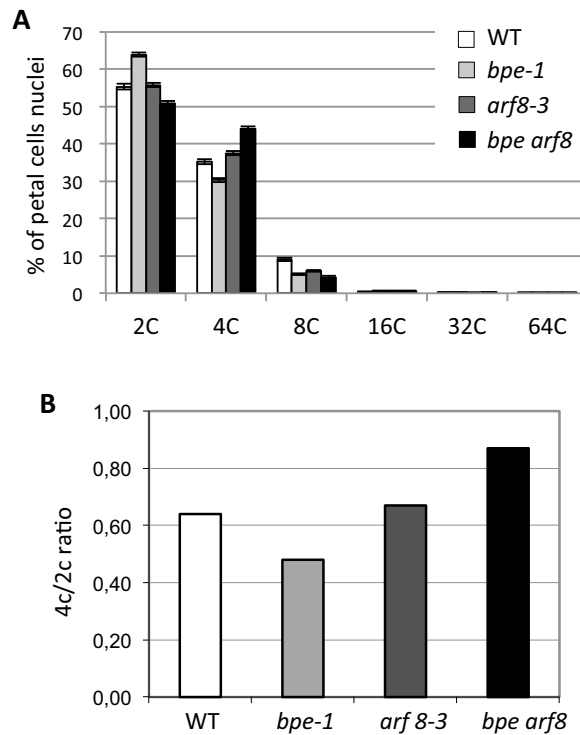

**Supplemental Figure 4. DNA content of petal cell nuclei.**

Nuclei were stained with propidium iodide before analysis of DNA content via flow cytometry.

**(A)** Distribution of nuclei passed on DNA content for each genotype as indicated. Confidence interval of the proportion of each type of nuclei showing significant difference ( $P < 0.05$ , t-test) is shown.

**(B)** 4c /2c nuclei ratio indicative of a first endocycle.

These nuclear DNA content analyses reveal no enhanced endoreduplication in petals of *bpe* or *arf8* single mutants. A slight increase in 2C content is observed in *bpe-1*. Conversely, a slight increase in 4C nuclei is observed in petals of the *bpe arf8* double mutant compared to the wild type. This increased ploidy is however not confirmed with additional endocycle.

**Supplemental Table 1 : Sequence of primers used in this study**

| Primer         | Gene             | Sequence                                             | Experiment                                                |
|----------------|------------------|------------------------------------------------------|-----------------------------------------------------------|
| At SAUR r      | <i>SAUR-AC1</i>  | TATTGTTAAGCCGCCATTG                                  | qRT-PCR                                                   |
| At SAUR l      | <i>SAUR-AC1</i>  | AAGGGAATCATCGTCGACAC                                 | qRT-PCR                                                   |
| At IAA 1 R     | <i>Aux/IAA1</i>  | TGGACGGAGCTCCATATCTC                                 | qRT-PCR                                                   |
| At IAA 1 F     | <i>Aux/IAA1</i>  | ACCGACCAACATCCAATCTC                                 | qRT-PCR                                                   |
| At IAA 3 R     | <i>Aux/IAA3</i>  | TGATTGGATGCTCATTGGTG                                 | qRT-PCR                                                   |
| At IAA 3 F     | <i>Aux/IAA3</i>  | CAACCCAAGCACAGACAGAG                                 | qRT-PCR                                                   |
| At IAA 9 R     | <i>Aux/IAA9</i>  | GAGCTGCTGGGAAGGATATG                                 | qRT-PCR                                                   |
| At IAA 9 F     | <i>Aux/IAA9</i>  | GCTGCAGCTAACCCAATAGC                                 | qRT-PCR                                                   |
| At IAA 17 R    | <i>Aux/IAA17</i> | AGGGTTCTCAGAGACGGTTG                                 | qRT-PCR                                                   |
| At IAA 17 F    | <i>Aux/IAA17</i> | TTGATTTTTGGCAGGAAACC                                 | qRT-PCR                                                   |
| At IAA 19 F2   | <i>Aux/IAA19</i> | GACTCGGGCTTGAGATAACG                                 | qRT-PCR                                                   |
| At IAA 19 R2   | <i>Aux/IAA19</i> | CGTGGTCGAAGCTTCCTTAC                                 | qRT-PCR                                                   |
| ACT8 Q5        | <i>ACT8</i>      | GGTAACATTGTGCTCAGTGGTGG                              | qRT-PCR                                                   |
| ACT8 Q3        | <i>ACT8</i>      | AACGACCTTAATCTTCATGCTGC                              | qRT-PCR                                                   |
| TUB4 Q5        | <i>TUB4</i>      | AAGGCTTTCTTCATTGGTACA                                | qRT-PCR                                                   |
| TUB4 Q3        | <i>TUB4</i>      | CTCTCCGGCTGTAGCATCTT                                 | qRT-PCR                                                   |
| TCTP-F         | <i>TCTP</i>      | CACCCAAGCTCAGCGAAGAA                                 | qRT-PCR                                                   |
| TCTP-R         | <i>TCTP</i>      | CATGCATACCCTCCCAACAA                                 | qRT-PCR                                                   |
| ARF8-5         | <i>ARF8</i>      | GACATGAAGCTGTCAACATCTGG                              | qRT-PCR                                                   |
| ARF8-m3        | <i>ARF8</i>      | TAGGTGCTTACTCGGTATCC                                 | qRT-PCR                                                   |
| BPEp-F         | <i>BPEp</i>      | CTGCTCCCCAAAACAGAACTT                                | qRT-PCR                                                   |
| BPEp-R         | <i>BPEp</i>      | TGCTTAGATGAACATAATAGCGACTCCT                         | qRT-PCR                                                   |
| SD-D253-A-3    | <i>BPEp</i>      | CGAACCGCATAAACAGCGAGACTCCTACCCCGAGA                  | Site directed mutagenesis Asp <sup>253</sup>              |
| SD-D253-A-5    | <i>BPEp</i>      | TCTCGGGTAGGAGTCTCGTGTATGCGGTTTCG                     | Site directed mutagenesis Asp <sup>253</sup>              |
| SD-F260-A-3    | <i>BPEp</i>      | CGTTTATTGCAATGCTTAGCTGACCGAACC                       | Site directed mutagenesis Phe <sup>260</sup>              |
| SD-F260-A-5    | <i>BPEp</i>      | GCGGTTTCGGTCAGCTAAGCATTGCAATAAACG                    | Site directed mutagenesis Phe <sup>260</sup>              |
| SD-R250-A-3    | <i>BPEp</i>      | GCATAAACATCGAGACTCGCACCCCGAGAATACCTCG                | Site directed mutagenesis Arg <sup>250</sup>              |
| SD-R250-A-5    | <i>BPEp</i>      | CGAGGTATTCTCGGGTGCAGTCTCGATGTTTATGC                  | Site directed mutagenesis Arg <sup>250</sup>              |
| BPEpORF-F      | <i>BPEp</i>      | GATTAAGTCCATGGATCCGAGTGGG                            | Cloning of <i>BPEp</i> ORF in pAS2.1                      |
| BPEpORF-R      | <i>BPEp</i>      | ATCCGCCCGGAATTCAAGAAAACAAAACAGATTTTTGA               |                                                           |
| SDBPE-F        | <i>BPEp</i>      | CCGGAATTCGGGAAGAGGTGATGATTCTCATGATC                  | Cloning of SD <sup>BPEp</sup> in pAS2.1                   |
| BPEpORF-R      | <i>BPEp</i>      | ATCCGCCCGGAATTCAAGAAAACAAAACAGATTTTTGA               |                                                           |
| ARF8CTD-F      | <i>ARF8</i>      | CACCCAAGACACAACACTCATGAGT                            | Cloning of ARF8 in BiFC vector pBIFP3                     |
| ARF8CTD-R      | <i>ARF8</i>      | CTAGAGATGGTCCGGTTTTGC                                |                                                           |
| SDBPEBiFC-F    | <i>BPEp</i>      | GGGGACAAGTTTGTACAAAAAAGCAGGCTTAGGGGTAATGATTCTCATGATC | Cloning of <i>BPEp</i> in BiFC vector pBIFP2              |
| SDBPEBiFC-R    | <i>BPEp</i>      | GGGGACCACTTTGTACAAGAAAGCTGGGTATCAAGAAACAAAACAGATT    |                                                           |
| BPEpGFP-F      | <i>BPEp</i>      | GGGGACAAGTTTGTACAAAAAAGCAGGCTGATGGATCCGAGTGGGATG     | BPEp-GFP fusion Cloning                                   |
| BPEpGFP-R      | <i>BPEp</i>      | GGGGACCACTTTGTACAAGAAAGCTGGGTATCAAGAAACAAAACAGATT    |                                                           |
| ARF8mOrange-F  | <i>ARF8</i>      | GGGGACAGCTTTCTTGTACAAAGTGCTAAGCTGTCAACATCTGGA        | mOrange-ARF8 fusion Cloning                               |
| ARF8mOrange-R  | <i>ARF8</i>      | GGGGACAACCTTTGTATAATAAAGTTGCCTAGAGATGGTCCGGTT        |                                                           |
| BPEpSplicMut-F | <i>BPEp</i>      | CCACCCAAGAAGTAATGATTCTC                              | Mutagenesis of splice donor site for <i>BPEp</i> intron V |
| BPEpSplicMut-R | <i>BPEp</i>      | GAGAATCATTACTTCTTTGGGTGG                             |                                                           |
